# Supplementary material
Source: PubMed Central journal article supplement (PMC1175126)
Supplement: bj3890483add_table1.pdf [file bj3890483add_table1.pdf]

**Supplementary Table 1:** List of fatty acid desaturases having highest sequence homologies with the protein from *Ostreococcus tauri*.

The amino acid sequence of the putative desaturase from *Ostreococcus tauri* was used for a protein-protein BLAST search at the National Centre for Biotechnology Information (<http://www.ncbi.nlm.nih.gov/BLAST/>). Only functionally characterised proteins having the highest sequence homologies are shown.

| Organism                                    | Regiospecificity    | Identity (%) | Homology (%) | Nucleotide Accession Number |
|---------------------------------------------|---------------------|--------------|--------------|-----------------------------|
| <i>Thaustochytrium sp.</i> (marine protist) | $\Delta 5$          | 36           | 53           | AF489588                    |
| <i>Mortierella alpina</i> (fungus)          | $\Delta 6$          | 19           | 35           | AB070557                    |
| <i>Rhizopus oryzae</i> (fungus)             | $\Delta 6$          | 19           | 36           | AY583316                    |
| <i>Caenorhabditis elegans</i> (worm)        | $\Delta 6$          | 18           | 32           | AF031477                    |
| <i>Amylomyces rouxii</i> (fungus)           | $\Delta 6$          | 19           | 35           | AY392409                    |
| <i>Danio rerio</i> (zebrafish)              | $\Delta 6/\Delta 5$ | 20           | 38           | AF309556                    |
| <i>Homo sapiens</i>                         | $\Delta 6$          | 21           | 36           | AF134404                    |
| <i>Sparus aurata</i> (fish)                 | $\Delta 6$          | 20           | 38           | AY055749                    |
